# Supplementary material for: Cell Differentiation Trajectory-Associated Molecular Classification of Osteosarcoma
Source: Genes (Basel). 2021 Oct 23;12(11):1685. doi: 10.3390/genes12111685 (PMC8625454; doi:10.3390/genes12111685)
Supplement: Supplementary file 1 [file genes-12-01685-s001.zip]

Archive with 10 entries (10 files):
- Supplement Figure S1.png
- Supplement Figure S2.png
- Supplement Figure S3.png
- Supplement Figure S4.pdf
- Supplement Table S1.xlsx
- Supplement Table S2.xlsx
- Supplement Table S3.xlsx
- Supplement Table S4.xlsx
- Supplement Table S5.xlsx
- Supplement Table S6.xlsx
