# Supplementary material for: Cell Differentiation Trajectory-Associated Molecular Classification of Osteosarcoma
Source: Genes (Basel). 2021 Oct 23;12(11):1685. doi: 10.3390/genes12111685 (PMC8625454; doi:10.3390/genes12111685)
Supplement: Supplementary file 1 [file genes-12-01685-s001.zip › Supplement Table S1.xlsx]

## Sheet: Sheet1
Supplement Table S1. 542 tumor stem cell-related genes
tumor stem cell-related genes	cell differentiation-related genes	time-related genes
RCN3	RCN3	RCN3
FSTL1	FSTL1	FSTL1
CREB3L1	CREB3L1	CREB3L1
CD44	CD44	CD44
MMP2	MMP2	MMP2
PTN	PTN	PTN
VAMP8	VAMP8	VAMP8
IER2	IER2	IER2
COX5A	COX5A	COX5A
SLC25A3	SLC25A3	SLC25A3
RPS18	RPS18	RPS18
GSTA1	GSTA1	GSTA1
CYBA	CYBA	CYBA
JPT1	JPT1	JPT1
RAC1	RAC1	RAC1
UQCR11	UQCR11	UQCR11
CYCS	CYCS	CYCS
TPX2	TPX2	TPX2
ID3	ID3	ID3
C1QC	C1QC	C1QC
MMP13	MMP13	MMP13
CCNB1	CCNB1	CCNB1
HMGB3	HMGB3	HMGB3
FGFR1	FGFR1	FGFR1
FXYD6	FXYD6	FXYD6
DNAJB1	DNAJB1	DNAJB1
RPS5	RPS5	RPS5
LY6K	LY6K	LY6K
ARL6IP1	ARL6IP1	ARL6IP1
PCOLCE	PCOLCE	PCOLCE
RPL7A	RPL7A	RPL7A
HMGN1	HMGN1	HMGN1
FKBP7	FKBP7	FKBP7
GJA1	GJA1	GJA1
SERPINF1	SERPINF1	SERPINF1
TSC22D1	TSC22D1	TSC22D1
ILF2	ILF2	ILF2
BASP1	BASP1	BASP1
A2M	A2M	A2M
TIMP3	TIMP3	TIMP3
SLC44A2	SLC44A2	SLC44A2
MXRA8	MXRA8	MXRA8
RGS3	RGS3	RGS3
CLTA	CLTA	CLTA
KPNA2	KPNA2	KPNA2
COL1A1	COL1A1	COL1A1
CD55	CD55	CD55
LYPLA1	LYPLA1	LYPLA1
RPS23	RPS23	RPS23
C1QTNF3	C1QTNF3	C1QTNF3
UCHL1	UCHL1	UCHL1
BIRC5	BIRC5	BIRC5
MEPE	MEPE	MEPE
GNAS	GNAS	GNAS
TAGLN2	TAGLN2	TAGLN2
ATP6V0B	ATP6V0B	ATP6V0B
MYL12A	MYL12A	MYL12A
NPC2	NPC2	NPC2
PLTP	PLTP	PLTP
LGALS1	LGALS1	LGALS1
TPI1	TPI1	TPI1
APOE	APOE	APOE
HLA-E	HLA-E	HLA-E
SLC25A5	SLC25A5	SLC25A5
NPB	NPB	NPB
HSPD1	HSPD1	HSPD1
CDK1	CDK1	CDK1
MRPL12	MRPL12	MRPL12
RPS28	RPS28	RPS28
NDUFS8	NDUFS8	NDUFS8
TRIR	TRIR	TRIR
FABP5	FABP5	FABP5
PANX3	PANX3	PANX3
MXD4	MXD4	MXD4
TUBB	TUBB	TUBB
NPW	NPW	NPW
CRYAB	CRYAB	CRYAB
SERPING1	SERPING1	SERPING1
CKB	CKB	CKB
LRRC75A	LRRC75A	LRRC75A
SON	SON	SON
TRAM1	TRAM1	TRAM1
EMILIN1	EMILIN1	EMILIN1
ID1	ID1	ID1
NPM1	NPM1	NPM1
COPZ2	COPZ2	COPZ2
HLA-DRA	HLA-DRA	HLA-DRA
CCT8	CCT8	CCT8
RPS4X	RPS4X	RPS4X
IFITM5	IFITM5	IFITM5
RPS3	RPS3	RPS3
RPS27A	RPS27A	RPS27A
LDHB	LDHB	LDHB
GMFG	GMFG	GMFG
TSC22D3	TSC22D3	TSC22D3
PTGES3	PTGES3	PTGES3
CFH	CFH	CFH
SDC2	SDC2	SDC2
BTF3	BTF3	BTF3
NRP2	NRP2	NRP2
IGFBP7	IGFBP7	IGFBP7
PRDX1	PRDX1	PRDX1
COX17	COX17	COX17
PRDX4	PRDX4	PRDX4
ARL4C	ARL4C	ARL4C
CST3	CST3	CST3
RHOA	RHOA	RHOA
NUPR1	NUPR1	NUPR1
HSPA8	HSPA8	HSPA8
MRPL15	MRPL15	MRPL15
SELENOP	SELENOP	SELENOP
RPS13	RPS13	RPS13
ARPC3	ARPC3	ARPC3
MYL6	MYL6	MYL6
SMC4	SMC4	SMC4
HLA-DQB1	HLA-DQB1	HLA-DQB1
MT-CYB	MT-CYB	MT-CYB
SCRG1	SCRG1	SCRG1
AURKA	AURKA	AURKA
MT-ND2	MT-ND2	MT-ND2
AHNAK	AHNAK	AHNAK
RPS8	RPS8	RPS8
TUBA1B	TUBA1B	TUBA1B
YIPF2	YIPF2	YIPF2
FN1	FN1	FN1
MAD2L1	MAD2L1	MAD2L1
RPS21	RPS21	RPS21
FTL	FTL	FTL
KLF6	KLF6	KLF6
PRRX1	PRRX1	PRRX1
C4orf48	C4orf48	C4orf48
IFI27	IFI27	IFI27
IFITM2	IFITM2	IFITM2
EMP1	EMP1	EMP1
RPL10	RPL10	RPL10
PFN2	PFN2	PFN2
AURKB	AURKB	AURKB
CKS1B	CKS1B	CKS1B
SYNGR2	SYNGR2	SYNGR2
NDUFA4L2	NDUFA4L2	NDUFA4L2
BNIP3	BNIP3	BNIP3
VMP1	VMP1	VMP1
KCNQ1OT1	KCNQ1OT1	KCNQ1OT1
SOX9	SOX9	SOX9
TPT1	TPT1	TPT1
FTH1	FTH1	FTH1
IER3	IER3	IER3
YWHAH	YWHAH	YWHAH
SNORC	SNORC	SNORC
OMD	OMD	OMD
CTSB	CTSB	CTSB
COL6A2	COL6A2	COL6A2
FBLN1	FBLN1	FBLN1
C1QBP	C1QBP	C1QBP
TTC3	TTC3	TTC3
NDUFB8	NDUFB8	NDUFB8
UQCRFS1	UQCRFS1	UQCRFS1
KIF20B	KIF20B	KIF20B
HLA-DPA1	HLA-DPA1	HLA-DPA1
SELENOW	SELENOW	SELENOW
ITGB1	ITGB1	ITGB1
FKBP10	FKBP10	FKBP10
COL5A2	COL5A2	COL5A2
ELN	ELN	ELN
VIM	VIM	VIM
CALR	CALR	CALR
UQCRB	UQCRB	UQCRB
NAA50	NAA50	NAA50
PCNA	PCNA	PCNA
THY1	THY1	THY1
HLA-A	HLA-A	HLA-A
LDHA	LDHA	LDHA
RPL22	RPL22	RPL22
PHF19	PHF19	PHF19
HSPA6	HSPA6	HSPA6
TAC3	TAC3	TAC3
METTL5	METTL5	METTL5
CAPG	CAPG	CAPG
GID4	GID4	GID4
SPP1	SPP1	SPP1
CRISPLD1	CRISPLD1	CRISPLD1
PLAC9	PLAC9	PLAC9
RANBP1	RANBP1	RANBP1
B2M	B2M	B2M
CAP1	CAP1	CAP1
DUSP1	DUSP1	DUSP1
HCFC1R1	HCFC1R1	HCFC1R1
PPFIBP1	PPFIBP1	PPFIBP1
MT-CO3	MT-CO3	MT-CO3
COX7B	COX7B	COX7B
ATP5PO	ATP5PO	ATP5PO
MRC2	MRC2	MRC2
RGCC	RGCC	RGCC
TPM1	TPM1	TPM1
CTSK	CTSK	CTSK
IGFBP2	IGFBP2	IGFBP2
PYCR1	PYCR1	PYCR1
SOST	SOST	SOST
CCNDBP1	CCNDBP1	CCNDBP1
GPX4	GPX4	GPX4
SFRP4	SFRP4	SFRP4
SELENOM	SELENOM	SELENOM
TYMS	TYMS	TYMS
FMOD	FMOD	FMOD
ZFAS1	ZFAS1	ZFAS1
RPL39	RPL39	RPL39
ATP5MF	ATP5MF	ATP5MF
RBM3	RBM3	RBM3
MXRA5	MXRA5	MXRA5
RRBP1	RRBP1	RRBP1
SRGN	SRGN	SRGN
PPIA	PPIA	PPIA
SNHG7	SNHG7	SNHG7
CDC20	CDC20	CDC20
WSB1	WSB1	WSB1
ERH	ERH	ERH
VEGFA	VEGFA	VEGFA
EEF1B2	EEF1B2	EEF1B2
ZWINT	ZWINT	ZWINT
FAM96A	FAM96A	FAM96A
CDH11	CDH11	CDH11
ACAN	ACAN	ACAN
AP2S1	AP2S1	AP2S1
S100A1	S100A1	S100A1
TUFM	TUFM	TUFM
SLC5A3	SLC5A3	SLC5A3
MYC	MYC	MYC
RPS4Y1	RPS4Y1	RPS4Y1
H2AFZ	H2AFZ	H2AFZ
MT1X	MT1X	MT1X
C12orf57	C12orf57	C12orf57
RPL30	RPL30	RPL30
TIMP1	TIMP1	TIMP1
GTSE1	GTSE1	GTSE1
RPLP2	RPLP2	RPLP2
KDELR3	KDELR3	KDELR3
PLOD2	PLOD2	PLOD2
AIF1	AIF1	AIF1
BGN	BGN	BGN
NUF2	NUF2	NUF2
GAL	GAL	GAL
COCH	COCH	COCH
CALM2	CALM2	CALM2
MATN4	MATN4	MATN4
IBSP	IBSP	IBSP
NNMT	NNMT	NNMT
HLA-DQA1	HLA-DQA1	HLA-DQA1
RPL36AL	RPL36AL	RPL36AL
PTTG1	PTTG1	PTTG1
IGFBP5	IGFBP5	IGFBP5
CTGF	CTGF	CTGF
HMGB2	HMGB2	HMGB2
C8orf59	C8orf59	C8orf59
ANXA5	ANXA5	ANXA5
BLVRB	BLVRB	BLVRB
STMN1	STMN1	STMN1
RAN	RAN	RAN
UBE2T	UBE2T	UBE2T
PRRX2	PRRX2	PRRX2
CD68	CD68	CD68
CKS2	CKS2	CKS2
ISG15	ISG15	ISG15
HSP90AA1	HSP90AA1	HSP90AA1
ASPN	ASPN	ASPN
COX6A1	COX6A1	COX6A1
ANXA2	ANXA2	ANXA2
VPS29	VPS29	VPS29
PSMA4	PSMA4	PSMA4
TAGLN	TAGLN	TAGLN
ARPC2	ARPC2	ARPC2
COL3A1	COL3A1	COL3A1
TK1	TK1	TK1
COL9A3	COL9A3	COL9A3
PTMA	PTMA	PTMA
TMBIM4	TMBIM4	TMBIM4
FAM3C	FAM3C	FAM3C
COL9A1	COL9A1	COL9A1
CNN2	CNN2	CNN2
LUM	LUM	LUM
TTC19	TTC19	TTC19
H2AFJ	H2AFJ	H2AFJ
EDIL3	EDIL3	EDIL3
TNC	TNC	TNC
FCGRT	FCGRT	FCGRT
IFITM3	IFITM3	IFITM3
CENPE	CENPE	CENPE
ASPM	ASPM	ASPM
SERPINH1	SERPINH1	SERPINH1
UBE2S	UBE2S	UBE2S
CRABP2	CRABP2	CRABP2
COL11A2	COL11A2	COL11A2
RACK1	RACK1	RACK1
NRN1	NRN1	NRN1
CD59	CD59	CD59
CD24	CD24	CD24
OGN	OGN	OGN
TUBB2B	TUBB2B	TUBB2B
DDIT4	DDIT4	DDIT4
PTGDS	PTGDS	PTGDS
PSAP	PSAP	PSAP
RAD23A	RAD23A	RAD23A
RPS6	RPS6	RPS6
POMP	POMP	POMP
PCLAF	PCLAF	PCLAF
RBP4	RBP4	RBP4
HMGN2	HMGN2	HMGN2
SERPINE2	SERPINE2	SERPINE2
IFI6	IFI6	IFI6
COX6B1	COX6B1	COX6B1
SDCBP	SDCBP	SDCBP
ATAD2	ATAD2	ATAD2
RPS10	RPS10	RPS10
PPP1R14B	PPP1R14B	PPP1R14B
LRP1	LRP1	LRP1
POSTN	POSTN	POSTN
RAP1B	RAP1B	RAP1B
SPI1	SPI1	SPI1
EFHD2	EFHD2	EFHD2
UBE2C	UBE2C	UBE2C
RPL5	RPL5	RPL5
DHPS	DHPS	DHPS
SOD1	SOD1	SOD1
RPS15A	RPS15A	RPS15A
FXYD5	FXYD5	FXYD5
CKLF	CKLF	CKLF
CCNB2	CCNB2	CCNB2
RPS3A	RPS3A	RPS3A
PDLIM4	PDLIM4	PDLIM4
CCPG1	CCPG1	CCPG1
JUNB	JUNB	JUNB
CCDC80	CCDC80	CCDC80
CENPW	CENPW	CENPW
CKAP2	CKAP2	CKAP2
DTYMK	DTYMK	DTYMK
CLU	CLU	CLU
XIST	XIST	XIST
ARL6IP5	ARL6IP5	ARL6IP5
RPL28	RPL28	RPL28
SEC61G	SEC61G	SEC61G
COL2A1	COL2A1	COL2A1
RPL18A	RPL18A	RPL18A
CD74	CD74	CD74
RRM2	RRM2	RRM2
OS9	OS9	OS9
MDK	MDK	MDK
MT-ND3	MT-ND3	MT-ND3
CD63	CD63	CD63
TOP2A	TOP2A	TOP2A
EMP3	EMP3	EMP3
GADD45GIP1	GADD45GIP1	GADD45GIP1
CPNE3	CPNE3	CPNE3
EFEMP2	EFEMP2	EFEMP2
A1BG	A1BG	A1BG
RPL3	RPL3	RPL3
THBS1	THBS1	THBS1
EGFL6	EGFL6	EGFL6
TUBA1C	TUBA1C	TUBA1C
NCOR1	NCOR1	NCOR1
AEBP1	AEBP1	AEBP1
PSMA7	PSMA7	PSMA7
TMBIM6	TMBIM6	TMBIM6
SLC16A3	SLC16A3	SLC16A3
CRIP2	CRIP2	CRIP2
HSP90AB1	HSP90AB1	HSP90AB1
PRSS23	PRSS23	PRSS23
HSPE1	HSPE1	HSPE1
RPL18	RPL18	RPL18
PSMB5	PSMB5	PSMB5
EIF4EBP1	EIF4EBP1	EIF4EBP1
ARPC1B	ARPC1B	ARPC1B
COPS3	COPS3	COPS3
GRN	GRN	GRN
C1QB	C1QB	C1QB
TCEA1	TCEA1	TCEA1
HTRA1	HTRA1	HTRA1
ANPEP	ANPEP	ANPEP
MT-ND5	MT-ND5	MT-ND5
ADIRF	ADIRF	ADIRF
CHCHD10	CHCHD10	CHCHD10
SLC29A1	SLC29A1	SLC29A1
GDI2	GDI2	GDI2
GNG11	GNG11	GNG11
RAB13	RAB13	RAB13
RUNX2	RUNX2	RUNX2
ATP5F1C	ATP5F1C	ATP5F1C
DKK1	DKK1	DKK1
SRPX	SRPX	SRPX
COX7A1	COX7A1	COX7A1
OLFML2B	OLFML2B	OLFML2B
PA2G4	PA2G4	PA2G4
ODC1	ODC1	ODC1
RPL13	RPL13	RPL13
PRDX2	PRDX2	PRDX2
RAC3	RAC3	RAC3
H2AFV	H2AFV	H2AFV
HSPH1	HSPH1	HSPH1
PDE4DIP	PDE4DIP	PDE4DIP
CA3	CA3	CA3
CALM3	CALM3	CALM3
ACTB	ACTB	ACTB
SRSF2	SRSF2	SRSF2
RPL23	RPL23	RPL23
ENO1	ENO1	ENO1
PCBD1	PCBD1	PCBD1
P4HA1	P4HA1	P4HA1
RNASE1	RNASE1	RNASE1
MAP1B	MAP1B	MAP1B
MKI67	MKI67	MKI67
ALKBH5	ALKBH5	ALKBH5
CD320	CD320	CD320
RPL35A	RPL35A	RPL35A
SH3BGRL3	SH3BGRL3	SH3BGRL3
FGFBP2	FGFBP2	FGFBP2
HLA-DMA	HLA-DMA	HLA-DMA
LOX	LOX	LOX
MYL9	MYL9	MYL9
HLA-DRB1	HLA-DRB1	HLA-DRB1
MEG3	MEG3	MEG3
NBL1	NBL1	NBL1
MTERF3	MTERF3	MTERF3
NIT2	NIT2	NIT2
ATP5F1B	ATP5F1B	ATP5F1B
HLA-B	HLA-B	HLA-B
HMMR	HMMR	HMMR
PKM	PKM	PKM
RNASET2	RNASET2	RNASET2
SSPN	SSPN	SSPN
RPS7	RPS7	RPS7
LY6E	LY6E	LY6E
LYZ	LYZ	LYZ
TPM2	TPM2	TPM2
GSTO1	GSTO1	GSTO1
LAPTM5	LAPTM5	LAPTM5
ENPP1	ENPP1	ENPP1
OLFML3	OLFML3	OLFML3
CSRP2	CSRP2	CSRP2
RHOBTB3	RHOBTB3	RHOBTB3
RGS10	RGS10	RGS10
CSTB	CSTB	CSTB
HILPDA	HILPDA	HILPDA
COL6A3	COL6A3	COL6A3
PABPC1	PABPC1	PABPC1
IL17B	IL17B	IL17B
PPIC	PPIC	PPIC
MRPS6	MRPS6	MRPS6
RPL11	RPL11	RPL11
TUBB4B	TUBB4B	TUBB4B
CCT5	CCT5	CCT5
YBX3	YBX3	YBX3
EIF3K	EIF3K	EIF3K
MALAT1	MALAT1	MALAT1
SNRPB	SNRPB	SNRPB
MIF	MIF	MIF
PFN1	PFN1	PFN1
TIMP2	TIMP2	TIMP2
CPE	CPE	CPE
CALD1	CALD1	CALD1
OAZ1	OAZ1	OAZ1
COX4I1	COX4I1	COX4I1
FCER1G	FCER1G	FCER1G
PSMB3	PSMB3	PSMB3
CERCAM	CERCAM	CERCAM
MRPL23	MRPL23	MRPL23
NFKBIA	NFKBIA	NFKBIA
SPARC	SPARC	SPARC
KCTD12	KCTD12	KCTD12
WWP2	WWP2	WWP2
CTSH	CTSH	CTSH
CLEC11A	CLEC11A	CLEC11A
COL5A1	COL5A1	COL5A1
ACTA2	ACTA2	ACTA2
DCN	DCN	DCN
PMEPA1	PMEPA1	PMEPA1
CTSZ	CTSZ	CTSZ
COL11A1	COL11A1	COL11A1
PRELP	PRELP	PRELP
LMNA	LMNA	LMNA
PHB	PHB	PHB
HLA-C	HLA-C	HLA-C
CYB5A	CYB5A	CYB5A
GAPDH	GAPDH	GAPDH
CLNS1A	CLNS1A	CLNS1A
COMMD6	COMMD6	COMMD6
PVT1	PVT1	PVT1
GALNT1	GALNT1	GALNT1
CDKN2A	CDKN2A	CDKN2A
SGO2	SGO2	SGO2
TMSB4X	TMSB4X	TMSB4X
TMED1	TMED1	TMED1
PPA1	PPA1	PPA1
MAGED2	MAGED2	MAGED2
HMGA1	HMGA1	HMGA1
CCL3	CCL3	CCL3
JUN	JUN	JUN
PCOLCE2	PCOLCE2	PCOLCE2
RPS14	RPS14	RPS14
ATIC	ATIC	ATIC
MT2A	MT2A	MT2A
HIST1H4C	HIST1H4C	HIST1H4C
MZT2A	MZT2A	MZT2A
TOMM7	TOMM7	TOMM7
TGFBI	TGFBI	TGFBI
TXNDC17	TXNDC17	TXNDC17
CALM1	CALM1	CALM1
SNAI2	SNAI2	SNAI2
ANP32B	ANP32B	ANP32B
CDKN3	CDKN3	CDKN3
NME1	NME1	NME1
HSPG2	HSPG2	HSPG2
ATP6V0E1	ATP6V0E1	ATP6V0E1
SIVA1	SIVA1	SIVA1
RPL14	RPL14	RPL14
CYR61	CYR61	CYR61
COL1A2	COL1A2	COL1A2
RPL37	RPL37	RPL37
ILF3-AS1	ILF3-AS1	ILF3-AS1
NDUFS7	NDUFS7	NDUFS7
EIF3G	EIF3G	EIF3G
IFI27L2	IFI27L2	IFI27L2
CISD3	CISD3	CISD3
LAPTM4B	LAPTM4B	LAPTM4B
TYMP	TYMP	TYMP
APOC1	APOC1	APOC1
CENPM	CENPM	CENPM
UQCRH	UQCRH	UQCRH
S100A13	S100A13	S100A13
COL12A1	COL12A1	COL12A1
ALPL	ALPL	ALPL
SAT1	SAT1	SAT1
CENPF	CENPF	CENPF
NUSAP1	NUSAP1	NUSAP1
DRG2	DRG2	DRG2
UBC	UBC	UBC
PNP	PNP	PNP
PSMB9	PSMB9	PSMB9
HAPLN1	HAPLN1	HAPLN1
HMGB1	HMGB1	HMGB1
MMP9	MMP9	MMP9
ATP5MD	ATP5MD	ATP5MD
ATP5MC3	ATP5MC3	ATP5MC3
PGK1	PGK1	PGK1
RPS27	RPS27	RPS27
	RAB2A	KCNMA1
	KRTCAP2	ACTR3
	RPS17	TKT
	FIBIN	HSPB1
	TSPAN11	BID
	CNBP	CXCL14
	DDT	MRPL4
	DMP1	TMEM160
	ADAM12	TOMM20
	POLR2L	RAP1A
	LMAN1	HMG20B
	PLAU	NDUFAB1
	CXCL3	PDLIM2
	MATK	SDHB
	RIDA	SOX4
	SQOR	C4orf3
	ANXA1	RRP7A
	C1R	ANP32E
	MMP7	GNAI2
	11-Sep	LAPTM4A
	S100P	CCDC34
	C15orf48	SFPQ
	DTNBP1	HNMT
	UBB	PDLIM7
	TCF25	NASP
	AES	ATP5MG
	EPN2	GRPEL1
	CD4	VKORC1
	COX6C	SMC3
	GABARAP	HES1
	NSMCE2	ATF3
	UNC5B	RHOC
	HLA-DRB5	TMEM45A
	RHOF	PLP2
	EPDR1	CAVIN3
	TRIM22	TRA2B
	PLEK	BTG1
	RNASE6	LAMTOR2
	PRDX6	SRI
	GPNMB	GRB2
	BMP3	TPM3
	CRYZL1	RPL12
	ITM2B	JTB
	PAPSS2	HNRNPR
	HCST	DYNLT1
	GLT8D2	MZT1
	RPL29	KIF5B
	COL9A2	ARF4
	PALLD	MYH9
	RPL35	COX8A
	MT-ATP6	IDH2
	CCL4L2	FUS
	NFATC1	RSRC1
	RAC2	UQCRC1
	AP1S2	CDC42EP3
	PDCD4	PBDC1
	SCX	PTMS
	PLK1	BAMBI
	ANO5	MRPS12
	SLC16A7	SGCB
	GFPT2	UPF3A
	MRPL52	NDUFA2
	P3H1	PDXK
	CTDSP2	HSPB11
	LAIR1	H3F3B
	EVI2A	GTF3A
	PLA2G2A	MRPL54
	MYO6	CD99
	DSTN	DCTN3
	TNNT3	SMC1A
	GYPC	C21orf59
	FRS2	HP1BP3
	ST8SIA4	CENPX
	ATP5F1D	GSTP1
	N4BP2L2	RPL22L1
	FOXC1	ASAH1
	CSF1	ZFP36L2
	CLEC2B	YWHAZ
	THBS3	TMPO
	TNFSF10	PRPF4B
	PLIN2	ZFHX4
	FNDC1	CEBPD
	MRPL47	JUND
	SCIN	MORF4L2
	RPLP1	ZFP36
	PSMB6	PHB2
	SLC40A1	DDX39A
	PTHLH	UBE2M
	P4HA3	RSRP1
	SNHG18	TCP1
	CCT2	KLF2
	COL18A1	TUBA1A
	DUSP2	NOP10
	SF3B6	DPP7
	LSM4	COX20
	B4GALT1	RPS26
	PENK	PHGDH
	LTBP1	MT-ND4
	RASGRP2	TALDO1
	COX7A2	UBE2D3
	NDUFAF6	EIF5A
	SEC11C	IER5L
	NCAM1	CHCHD1
	SNRPF	HEXB
	BAG1	PRKDC
	CD53	RBX1
	FCGBP	PSIP1
	CNN3	ATP5F1A
	TECR	HSPA1A
	NEAT1	NACA
	ZBTB20	SMS
	PIGP	TAF1D
	ENHO	NUDCD2
	RPSA	CENPA
	ENAH	CCDC85B
	TCF4	PRMT1
	SNX10	TMEM106C
	HBG2	SNRPG
	PRSS35	RND3
	MGST1	SPATS2L
	CXCL8	VDAC1
	CD58	TJP1
	TOM1L2	RABAC1
	MNDA	RCN1
	LACTB2	MDH2
	RPL4	PSMB8
	IRX3	LIMS1
	PLAGL1	UBE2L3
	MS4A6A	ATP6V1E1
	SH3PXD2A	SUPT16H
	MEGF10	H2AFX
	MMP23B	RPS24
	MT1G	ATP5ME
	CSTA	CPQ
	LTBP2	RPL24
	SFRP2	SRSF3
	CAPN6	TNFRSF12A
	RPS2	ATG3
	CCT4	NDUFV2
	SLC43A3	CLIC1
	NDUFA13	MCL1
	MRPS7	LRRFIP1
	S100A3	CRNDE
	AP2M1	UFC1
	SATB2	EEF1A1
	LRIG3	SSR4
	LIMA1	HNRNPC
	CTSS	GADD45B
	RPL7	PPP1CA
	PGAM1	DNAJB11
	GSN	PABPN1
	RAMP1	NDUFB3
	NDUFAF8	SEPT7
	PDGFD	EIF4B
	LXN	RGS2
	SDC4	RTN4
	SGK1	ATP6V1F
	AVIL	BUB3
	SNRPD1	GGH
	LGALS3BP	VPS35
	FGFR2	PGP
	HLA-DMB	LMO7
	TWF2	HNRNPH1
	AURKAIP1	MRPL18
	SLIT3	PPP1R15A
	ANTXR1	PRR13
	TAF9	NUCKS1
	ISCU	SMC2
	SPHK1	IKBIP
	RUVBL1	COMMD4
	DNAJA1	TUBB2A
	MATN3	RPL36
	RPS29	MARCKS
	IFNGR2	MYL12B
	LHFPL6	CAPZA1
	OPN3	ERP29
	KLK4	SRSF7
	GNA15	EPB41L4A-AS1
	GNG4	TPM4
	SOX17	GHITM
	SLIRP	LGMN
	UACA	CNPY3
	CD200	UQCR10
	CCND1	HNRNPA2B1
	CCL4	GADD45A
	NET1	HACD3
	ANP32A	NBDY
	MGP	EIF5
	LAT2	EID1
	ITM2C	UQCC2
	LST1	HNRNPF
	LRRC15	HSPA9
	CDK4	LSM5
	VSIG4	ZFP36L1
	WIF1	BRI3
	NSD3	HPCAL1
	CILP2	FOS
	FAM107B	IQGAP1
	ATP5MC2	SAP18
	CD9	UFD1
	ITGB2	TUBB6
	FOLR2	DCTPP1
	G0S2	RHOB
	CTSD	SAP30
	CXXC5	CCNB1IP1
	S100A6	RPS12
	APEX1	HADH
	RPL6	GLUL
	ITPR2	DYNLL1
	CCNA2	EIF3J
	S100A16	PPIF
	FBN1	RNASEH2B
	MIA	VAMP5
	RAB31	HPRT1
	RPL27	APLP2
	MT-ND1	SNRNP25
	MDFI	SNRPN
	EIF3H	CYTOR
	TSPAN31	CA2
	CCL2	ATP5PB
	TMEM205	PMAIP1
	SLC9B2	NDUFA1
	WWP1	IER5
	CCND3	NCL
	S100A11	METTL26
	ARGLU1	SNHG8
	COL8A1	CD81
	PSME1	MRPS16
	ATP5PF	H1FX
	HMGA2	DUT
	MVP	ARPC4
	CD109	RAB32
	RGS1	ID2
	PDE7B	DDX21
	UCP2	BARX1
	ELOC	GOLIM4
	PTDSS1	PPP4C
	PTPRC	DST
	CCT7	UBXN1
	MMP11	GLRX5
	KIAA0040	RAB5C
	SMOC2	CYB5R3
	RPS15	MLF2
	CD14	MT-CO1
	ITGA4	RPA3
	ARHGDIB	CADM1
	PODNL1	CLSPN
	YBX1	FAM162A
	PRKCSH	PSMC5
	ENG	INAFM1
	RPL26	DCXR
	DPT	HSPA1B
	COL5A3	CACYBP
	OBSL1	MT-CO2
	C1S	ARHGDIA
	HMOX1	HNRNPA3
	FAM207A	RPL37A
	FCGR2A	PTPMT1
	PDGFRL	GUK1
	P4HA2	EIF4A2
	MFAP4	MRPS25
	TYROBP	SNRPD3
	C19orf66	GMNN
	RPLP0	MCRIP2
	CLEC3A	PSMD7
	SIGLEC15	RAD21
	GADD45G	RNMT
	BGLAP	BOLA3
	PTPRD	FOSB
	OCIAD2	MRPL51
	ATP6V1B2	PCBP2
	FAP	GTF3C6
	TMSB15A	TOMM40
	ARHGAP18	TPRKB
	BST2	NUDT5
	DUSP6	PSMC3
	INHBA	P4HB
	CTNNBIP1	SEPT11
	CCDC3	BUD23
	MFGE8	KDELR2
	S100A4	HDGF
	ACP5	C11orf96
	GPR183	RPS25
	RAI1	CBX5
	RPS20	IGFBP3
	LOXL2	DEK
	NUCB2	ZFAND2A
	RPL21	OST4
	CLIC3	ACTN1
	FYB1	KPNB1
	HOMER2	KHDRBS1
	ALOX5AP	ITGAE
	DNMT1	COX7C
	EPB41L2	PMP22
	ANKH	NME3
	ADAMTS1	BCAT1
	PLXDC2	PSME2
	NFIX	OLA1
	SAMHD1	PLEKHA5
	TACC3	HIGD2A
	MMP14	ECI1
	TREM2	HNRNPU
	MS4A4A	MAP2K3
	PLAT	FLNA
	MDM2	APRT
	ITGBL1	SELENOT
	FGF7	CCT6A
	POLR2K	MAD2L2
	CXCL2	CFD
	DNM3OS	SKA2
	NDRG1	USP1
	ZNF706	BTG3
	EEF1D	VDAC2
	RRP1	CCDC88A
	NCAM2	ACTR2
	SLAMF9	MEF2C
	CHI3L2	H2AFY
	LEPROTL1
	IGFBP6
	SDC1
	RMDN1
	IFI44L
	STAB1
	MELTF
	LGALS3
	CALU
	CFL1
	CPSF6
	PSMG1
	HOOK2
	9-Mar
	CCL3L1
	RPL34
	HLA-DPB1
	SSB
	CXCL12
	IFI30
	MSX1
	CORO1A
	MGST2
	EVI2B
	UBL5
	EHD4
	GPSM3
	UBA52
	COL14A1
	SOX8
	DNPH1
	COMP
	CAV1
	LGALS9
	DLX5
	FGFR1OP2
	SPARCL1
	THBS2
	DIO2
	CYBB
	MTDH
	SLC25A6
	CCT3
	SYT8
	SMOC1
	SSR2
	SPC25
	AC027031.2
	TCIRG1
	MFAP2
	SEMA3D
	RPL27A
	RPL9
	GSTM3
	LOXL3
	STOML2
	FLRT2
	COL16A1
	GPX8
	TNIP1
	RHOG
	HBB
	ITM2A
	NUP107
	CDC37
	S100A10
	NEDD8
	DLGAP5
	C1orf54
	RHBDL2
	AQP1
	IL7R
	STX10
	SEC62
	PEG3
	MS4A7
	PCDH9
	ZSWIM7
	DHRS4
	VCAN
	SLC39A8
	PLPPR2
	KANK2
	VCAM1
	DSEL
	STAT2
	CCL5
	EIF1AY
	MAP1LC3A
	CDH7
	C19orf24
	LLPH
	LRRFIP2
	GLIPR1
	ITGA11
	SULF1
	LAMB2
	RPS27L
	RPL13A
	PEMT
	NFKBIE
	CLEC18A
	CD84
	RBM8A
	PLPP5
	SLC35E3
	CCND2
	LCP1
	TIMM13
	UGP2
	RASSF8
	PDGFRA
	PLD3
	NDUFA12
	NDUFS5
	SERF2
	USP22
	FCGR1A
	SRM
	RPL8
	PLA2G16
	CLEC4A
	SARAF
	IL1B
	IGSF6
	COL6A1
	COL10A1
	MT1A
	TXN
	MPRIP
	SFT2D1
	C1QA
	LRRC57
	IGFBP4
	COL8A2
	HES4
	JDP2
	PPP1R18
	CTHRC1
	HIST1H1C
	POLR2E
	SSBP1
	TRPS1
	CSF1R
	ERGIC2
	PTH1R
	ACTG1
	ATP1B3
	KCNN4
	COL27A1
	CHCHD2
	PLAUR
	FKBP11
	FLII
	BHLHE41
	RPL26L1
	CHPF
	TWIST1
	PEBP1
	FDPS
	LY96
	LTBP3
	ITGB5
	PYCARD
	TMEM176B
	GPC1
	NCLN
	CYP1B1
	APP
	AOC2
	BMP8B
	C1QTNF1
	FAM49B
	HDLBP
	NDUFB9
	HCLS1
	CKAP4
	S100A9
	CBR1
	BIRC3
	RNASEH1
	CTSC
	CDCA8
