# Supplementary material for: Cell Differentiation Trajectory-Associated Molecular Classification of Osteosarcoma
Source: Genes (Basel). 2021 Oct 23;12(11):1685. doi: 10.3390/genes12111685 (PMC8625454; doi:10.3390/genes12111685)
Supplement: Supplementary file 1 [file genes-12-01685-s001.zip › Supplement Table S2.xlsx]

## Sheet: Sheet1
Supplement Table S2. 36 prognostic tumor stem cell-related genes
36genes	prognostic genes by univariate cox	prognostic genes by Kaplan-Meier analysis
KPNA2	ABCB8	ABI3BP
TUFM	ABL2	ABT1
LDHB	ABT1	ACAA1
RPS14	ACAA1	ACADSB
CKLF	ACO2	ACHE
DKK1	ACTR5	ACLY
VIM	ADRA2A	ACO2
RAD23A	AFF1	ADAM18
MYC	AHCY	ADAM2
CTSB	AKAP1	ADCY7
SERPINF1	AKAP12	AFF1
PA2G4	ALDH1B1	AGPAT5
THBS1	ALG8	AKAP1
CD320	ALPK3	AKAP8
RPS28	ANAPC5	ALDH1B1
GADD45GIP1	ANGPT1	ALG5
PDLIM4	ANGPT2	ALPK3
HSPE1	ANKH	AMIGO2
CD55	APOL6	ANAPC5
SERPINH1	ARHGAP25	AP2A2
CCNB1	ARHGDIA	AP3B2
IER3	ARHGEF10L	APC2
CCT8	ARHGEF18	APOL6
CREB3L1	ARL14	ARHGAP25
THY1	ARMC6	ARL1
FABP5	ARSB	ARL15
IBSP	ARVCF	ARMC6
DTYMK	ATF4	ASAH1
HSPD1	ATG16L1	ASB7
S100A1	ATN1	ASH1L
RPS27A	ATP13A1	ATF4
SDC2	ATRX	ATF7
COL5A2	AVPR1A	ATG16L1
ID3	B4GALT6	ATN1
FCER1G	BAG2	ATP4A
PHB	BAMBI	ATP7A
	BBS4	B3GALT1
	BHMT2	B3GAT3
	BRD4	B4GALT6
	C11orf1	BAD
	C12orf4	BAG2
	C20orf27	BCAM
	C7	BCAT1
	C8orf44	BCL2L1
	CAMK1	BCLAF1
	CAMKV	BET1
	CAMTA1	BMP5
	CBS	BMPR1B
	CCT7	BNIP3L
	CCT8	BRD4
	CD28	BYSL
	CD320	C10orf88
	CD3EAP	C14orf166
	CD55	C1GALT1
	CD72	C20orf27
	CD86	C3AR1
	CDC23	CA4
	CDC37	CA6
	CDH2	CACNG4
	CDH9	CAMK1
	CDK5RAP3	CARD14
	CDKN2C	CARM1
	CES2	CBFA2T2
	CHD1	CBS
	CHORDC1	CBX5
	CHRM3	CBX6
	CHRNA6	CC2D1A
	CKLF	CCNB1
	CKMT2	CCT6A
	CLCN6	CD3EAP
	CLDN1	CD55
	CLDN5	CD72
	CLK2	CD86
	CLN5	CDC23
	CLSTN2	CDC37
	CLTCL1	CDC42EP2
	CNNM3	CEP250
	COL4A4	CGREF1
	COL5A2	CHD1
	COL5A3	CHD2
	COLQ	CHMP7
	COPS8	CHORDC1
	CPT2	CHRM2
	CREB3L1	CHRM3
	CRK	CHSY1
	CTNNBIP1	CKLF
	CUL7	CKMT2
	CYFIP1	CLCC1
	CYFIP2	CLCN6
	CYP2R1	CLDN3
	CYTL1	CLIC4
	DCTN1	CLOCK
	DCTN4	CLSTN2
	DDA1	CLTCL1
	DDX27	COL5A3
	DDX49	COLQ
	DEXI	COPS7A
	DKK1	COPS8
	DLAT	COX10
	DLX2	COX7A2
	DMRT1	CREB3L1
	DMXL2	CRYGB
	DNAH7	CSF1R
	DNAJA2	CSF3R
	DNAJC10	CSNK1E
	DNAJC12	CST4
	DNAJC13	CSTF3
	DNM1L	CTNNBIP1
	DNMBP	CTSB
	DPH2	CTSD
	DYRK4	CTSS
	EEF1E1	CUL7
	EFHD1	CYFIP1
	EHD2	CYP27A1
	EI24	CYP2C8
	ELK4	DCTN3
	EML4	DCTN4
	ENPEP	DDX31
	ENSA	DDX42
	EPB41	DDX49
	ESR2	DKK1
	ETNK1	DMXL2
	ETS2	DNAJC10
	ETV4	DNAJC13
	EXOSC5	DPH2
	FABP3	DPYSL4
	FAM90A1	DTYMK
	FAM98A	DUSP6
	FARP2	ECE2
	FCGR2B	EHD2
	FGFR2	EI24
	FH	EIF5B
	FKBP4	ELOVL5
	FKBP5	EN1
	FKRP	ENPEP
	FLJ22184	EPB41
	FOXJ3	EPN1
	FRZB	EPS15L1
	FZD1	ERAL1
	FZD6	ERCC3
	GABPA	ETNK2
	GADD45GIP1	ETS2
	GALNT10	ETV4
	GATAD2A	F10
	GCM2	F12
	GCN1L1	FABP2
	GCNT4	FABP5
	GEMIN4	FADD
	GMIP	FAIM
	GNAI1	FAM90A1
	GNB5	FAM98A
	GNG10	FAP
	GNPDA1	FBXL5
	GNPTAB	FBXO9
	GOLGA7	FCER1G
	GPC3	FCGR2B
	GREM2	FEM1B
	GRM2	FGF9
	GSPT1	FGG
	GSS	FLJ22184
	GTF3C3	FOXJ2
	GUF1	FOXJ3
	HIST1H1D	FRAT1
	HIST1H2AE	GANAB
	HIST1H2BD	GATA6
	HIST1H3I	GATM
	HMGCL	GCM2
	HOXB6	GCN1L1
	HRC	GFPT2
	HSPA4	GIP
	HSPD1	GLUD2
	HSPE1	GMIP
	IBSP	GNAI1
	ICAM4	GNB5
	ID3	GNG10
	IER3	GNPDA1
	IGFBP3	GNPTAB
	IL11	GOLPH3L
	IL4	GPR116
	IMMT	GPR37
	IMPDH2	GPSM3
	IMPG1	GRM2
	INPP5F	GRM6
	IQCH	GSPT1
	IQSEC1	GTF2H1
	ITK	GTF3C2
	JAK3	GTF3C3
	KBTBD11	GUF1
	KEAP1	H6PD
	KIF13B	HAP1
	KLK1	HBE1
	KPNA2	HCK
	LAMP1	HCRT
	LAT2	HIST1H2BD
	LDHB	HIVEP1
	LDOC1	HK1
	LGR4	HLA-DMB
	LHX2	HOMER1
	LIMK2	HOXB6
	LPPR4	HRASLS2
	LRP5	HSPE1
	LRRC1	HTATSF1
	LRRC59	IBSP
	LSM14B	IDH1
	LTC4S	IER3
	LUZP2	IFI44
	LY9	IKBKB
	MAOB	IKBKE
	MAP2	IL10RA
	MAPK6	IL11
	MBD1	IL12A
	MCAM	IL4
	MCF2	IMPA1
	MCFD2	IMPG1
	MCM10	ING4
	MDFIC	ISYNA1
	MEOX2	ITGBL1
	MERTK	ITM2A
	METTL2B	JAK2
	MGLL	KCNJ8
	MGMT	KCNJ9
	MIPEP	KCNQ2
	MLF2	KEAP1
	MMP12	KHDRBS1
	MPP3	KLF11
	MRPL19	KLHL26
	MRPL4	KLK1
	MRPS7	KPNA3
	MTHFD2	KRIT1
	MTM1	LAIR1
	MUC1	LAMP1
	MXI1	LATS1
	MYC	LBR
	NAP1L1	LGR4
	NARS2	LIMK2
	NAT9	LPPR4
	NAV2	LRP5
	NDUFB2	LRRC15
	NEDD4L	LSM12
	NES	LSM14B
	NFKBIB	LTC4S
	NIPA2	LY9
	NOTCH4	MAN2A2
	NR2F6	MAN2B1
	NTHL1	MAP2
	NUDT2	MAP2K7
	NUP107	MAP3K10
	NUP88	MAP3K2
	NUPL1	MAPKAPK2
	OGFRL1	MARK1
	OR10H1	MARK2
	OR12D2	MARK4
	PA2G4	MCAM
	PABPC3	METTL2B
	PACS2	MGEA5
	PANK4	MGLL
	PARN	MID1
	PARP12	MMP12
	PARP6	MPP1
	PARP8	MPP3
	PCDHGA8	MRPL19
	PCTP	MRPS7
	PDE6C	MTM1
	PEBP1	MTMR6
	PER3	MTRR
	PEX5	MUC1
	PFKFB2	MUSK
	PGAM2	MXI1
	PHB	MYCT1
	PHB2	MYH2
	PI15	N4BP1
	PIK3CD	NAGK
	PKD2L2	NAP1L1
	PLCB4	NARS
	PLCL2	NAT9
	PLEKHF1	NAV2
	PNMA3	NCBP1
	PNPO	NCF1
	POLR1D	NCK1
	PPME1	NDE1
	PPP1CC	NDUFAF1
	PPP2R5C	NDUFB2
	PPP3CB	NDUFS6
	PPP4R1	NEDD4
	PQBP1	NEDD4L
	PRPF4B	NELL1
	PRUNE	NNT
	PSMC5	NR2F2
	PSME3	NR2F6
	PSTPIP1	NRAP
	PTK2B	NRG2
	PTPN20B	NSUN5
	PTPN22	NUDT2
	PTPRH	NUP107
	PUS7	NUP88
	PYGM	NXPH4
	QTRTD1	OASL
	RAB11FIP1	OGT
	RAB20	OMP
	RAB40B	OR12D2
	RAD23A	PACS1
	RAD51AP1	PACS2
	RALBP1	PARP6
	RASL11B	PCDHGA8
	RCHY1	PCK2
	RFC3	PDE6C
	RGSL1	PDLIM4
	RHD	PDPR
	RIMS1	PEX19
	RNF138	PEX5
	RORA	PEX6
	RPL10A	PFKFB2
	RPL29	PGM1
	RPLP1	PIK3R4
	RPP40	PIP5K1B
	RPRM	PKIA
	RPS14	PKN1
	RPS15	PLCL2
	RPS27A	PLEKHO1
	RPS28	PLS1
	RPS6KB1	PLXNC1
	RRAS2	PMF1
	RRN3	POGK
	RSAD1	POLE
	RUFY1	POLG2
	SCAMP4	POLR1C
	SCARF1	PPP1CB
	SDC2	PPP1CC
	SDC4	PPP2R1B
	SDCCAG3	PPP2R5C
	SEC23B	PPP3CB
	SEH1L	PQBP1
	SELPLG	PRDM1
	SERPINH1	PREPL
	SESN1	PRKCH
	SF1	PRPF4B
	SFMBT1	PRSS22
	SGCB	PSMD10
	SH3BP1	PSTPIP1
	SHCBP1	PTK2B
	SHQ1	PYCRL
	SIX1	PYY
	SLC16A1	QDPR
	SLC19A1	QRICH1
	SLC1A2	QTRTD1
	SLC1A5	R3HDM1
	SLC24A2	RAB15
	SLC25A37	RAB27A
	SLC38A2	RAB32
	SLC5A6	RAB5C
	SLC7A1	RABEP1
	SLC7A5	RABGGTA
	SMARCA1	RAPGEFL1
	SMARCC1	RBL1
	SMNDC1	REXO2
	SMPDL3A	RFK
	SMUG1	RGS20
	SMURF2	RGSL1
	SNCA	RHBDL1
	SPAST	ROS1
	SPG20	RPS6KB1
	SPINT2	RRN3
	SRPK1	RSAD1
	SS18	S100A1
	ST13	S100A2
	STAM2	SACM1L
	STC2	SAMM50
	STRAP	SAP130
	STRN3	SAP30
	STUB1	SAR1A
	STX10	SART3
	SUCLG2	SCARF1
	SULT1A1	SCG3
	SUPV3L1	SCYL2
	SYDE1	SDC2
	TAF1	SELPLG
	TAOK3	SENP5
	TBXAS1	SERP1
	TCF7L2	SERPINA1
	TCL1A	SERPINA6
	TEAD4	SERPINF1
	TERT	SERTAD3
	TFEC	SF1
	TFG	SF3A2
	TFPI2	SFXN3
	TGFB2	SGCB
	TGOLN2	SGCG
	THBS1	SHQ1
	TIAL1	SLC1A1
	TIAM2	SLC1A2
	TIMM8A	SLC1A6
	TIMM8B	SLC22A18
	TINF2	SLC25A10
	TK2	SLC26A1
	TLR4	SLC7A1
	TM6SF1	SLC7A5
	TMC5	SLC8A2
	TMEM33	SMA4
	TOMM70A	SMAD3
	TP53I3	SMAD9
	TRAM2	SMARCA1
	TRAP1	SMARCC2
	TRIAP1	SMEK2
	TRIT1	SMS
	TRMT1	SMURF2
	TRMT12	SNAPC3
	TTC18	SNCA
	TTLL12	SNX15
	TUFM	SNX17
	TULP2	SOX15
	TULP4	SP4
	U2AF2	SPAST
	UBE2H	SPG20
	UBE2N	SPIN1
	UBE2O	SRD5A2
	UBTD1	SRPK1
	USP25	SRPK2
	VARS	SSFA2
	VHL	SSTR1
	VNN2	STAM2
	VPS13A	STEAP3
	VPS13D	STUB1
	VPS39	STX8
	WASF3	SUCLG2
	WDR3	SULT1A1
	WDR4	SULT1C2
	WDR47	SUPV3L1
	WDR7	TAF6L
	WNT4	TAOK3
	XPO4	TBC1D9
	YARS2	TBKBP1
	ZMYM4	TCF3
	ZNF174	TCF7L2
	ZNF211	TEAD4
	ZNF32	TEX15
	ZNF41	TGFB2
	ZW10	THAP1
	ZWILCH	THPO
		THY1
		TIAM2
		TIGD6
		TIMM44
		TIMM8B
		TKTL1
		TLR1
		TLR4
		TMEM9B
		TNFRSF17
		TOMM70A
		TP53I3
		TRAM2
		TRAPPC2
		TRH
		TRIAP1
		TRIM15
		TRIM21
		TRIT1
		TRMT1
		TRMT12
		TSC2
		TSPAN15
		TTLL12
		TUBGCP4
		TULP2
		TYROBP
		UAP1
		UBE2H
		UBE2O
		UBE3B
		UBIAD1
		UBQLN2
		UNG
		USP25
		VIM
		VNN1
		VNN2
		VPS4A
		WASF3
		WDR4
		WDR47
		WDR7
		YIPF4
		YIPF5
		ZDHHC13
		ZFAND3
		ZMYND11
		ZNF10
		ZNF165
		ZNF174
		ZNF331
		ZNF41
		ZNF580
		ZNF589
		ZNF654
		ZNF91
		ZW10
		ZWILCH
