# Supplementary material for: Cell Differentiation Trajectory-Associated Molecular Classification of Osteosarcoma
Source: Genes (Basel). 2021 Oct 23;12(11):1685. doi: 10.3390/genes12111685 (PMC8625454; doi:10.3390/genes12111685)
Supplement: Supplementary file 1 [file genes-12-01685-s001.zip › Supplement Table S3.xlsx]

## Sheet: Sheet1
Supplement Table S3. The differences between two subtypes via unsupervised clustering
In GEO cocort
characters	p	p.adj	method
age_mouths	0.0904	0.09	Wilcoxon
gender	0.208	0.21	Wilcoxon
Stage	0.221	0.22	Wilcoxon
ImmuneScore	1.64e-05	1.6e-05	Wilcoxon
StromalScore	0.0123	0.012	Wilcoxon
ESTIMATEScore	0.000262	0.00026	Wilcoxon
TumorPurity	0.000262	0.00026	Wilcoxon
In TARGET cocort
characters	p	p.adj	method
age_mouths	0.448	0.45	Wilcoxon
gender	0.762	0.76	Wilcoxon
stage_diagnosis	0.321	0.32	Wilcoxon
ImmuneScore	0.0189	0.019	Wilcoxon
StromalScore	0.000555	0.00056	Wilcoxon
ESTIMATEScore	0.00125	0.0012	Wilcoxon
TumorPurity	0.00125	0.0012	Wilcoxon
