# Supplementary material for: Cell Differentiation Trajectory-Associated Molecular Classification of Osteosarcoma
Source: Genes (Basel). 2021 Oct 23;12(11):1685. doi: 10.3390/genes12111685 (PMC8625454; doi:10.3390/genes12111685)
Supplement: Supplementary file 1 [file genes-12-01685-s001.zip › Supplement Table S4.xlsx]

## Sheet: Sheet1
Supplement Table S4. The latent drugs via prognositic tumor stem cell-related genes in osteosarcoma
rank	cmap name and cell line	mean	n	enrichment	p	specificity	percent non-null
7	5707885 - PC3	-0.652	2	-0.976	0.00113	0.0161	100
73	proglumide - PC3	-0.621	2	-0.859	0.03974	0.0524	100
12	midecamycin - PC3	-0.586	2	-0.955	0.00429	0.0054	100
4	naproxen - PC3	-0.585	3	-0.94	0.00032	0	100
23	ethambutol - PC3	-0.584	2	-0.93	0.01024	0.0114	100
65	denatonium benzoate - MCF7	-0.57	2	-0.869	0.03406	0.0311	100
31	tiapride - PC3	-0.569	2	-0.913	0.01521	0.0103	100
25	salsolidin - MCF7	-0.566	2	-0.929	0.01056	0.0235	100
29	pyrimethamine - PC3	-0.553	2	-0.915	0.01453	0.0265	100
33	nomifensine - MCF7	-0.541	2	-0.91	0.01604	0.0387	100
5	metformin - MCF7	-0.539	7	-0.718	0.00032	0	85
61	ivermectin - MCF7	-0.537	2	-0.874	0.03177	0.079	100
40	trifluridine - MCF7	-0.533	2	-0.893	0.02284	0.0391	100
60	betaxolol - MCF7	-0.532	2	-0.876	0.03084	0.0055	100
35	luteolin - MCF7	-0.53	2	-0.904	0.01857	0.0476	100
28	vincamine - PC3	-0.528	2	-0.92	0.01286	0.0121	100
36	chrysin - MCF7	-0.525	2	-0.901	0.01944	0.0217	100
74	cefalotin - MCF7	-0.523	2	-0.858	0.04038	0.0148	100
38	hexamethonium bromide - MCF7	-0.519	2	-0.895	0.02215	0.0154	100
13	genistein - HL60	-0.514	3	-0.858	0.00573	0.0403	100
45	naphazoline - MCF7	-0.512	2	-0.888	0.02505	0.0054	100
37	diphenylpyraline - PC3	-0.511	2	-0.896	0.02157	0	100
39	sulfathiazole - PC3	-0.511	2	-0.894	0.02259	0.0843	100
77	betahistine - MCF7	-0.511	2	-0.856	0.04165	0.0391	100
62	milrinone - MCF7	-0.506	2	-0.873	0.03225	0.067	100
55	pentoxyverine - MCF7	-0.498	2	-0.879	0.02925	0.0259	100
44	thioproperazine - MCF7	-0.494	2	-0.891	0.02382	0.0265	100
56	meticrane - MCF7	-0.489	2	-0.878	0.0298	0.0432	100
88	etamivan - MCF7	-0.489	2	-0.844	0.04917	0.0579	100
53	sulfachlorpyridazine - MCF7	-0.487	2	-0.882	0.02791	0.026	100
57	erastin - PC3	-0.487	2	-0.878	0.03004	0.0672	100
50	tretinoin - HL60	-0.484	5	-0.606	0.02671	0.2049	80
71	cefalexin - MCF7	-0.473	3	-0.733	0.03906	0.0737	100
80	hydroxyachillin - MCF7	-0.459	2	-0.853	0.04286	0.0533	100
85	clomifene - MCF7	-0.456	2	-0.846	0.04778	0.1805	100
43	3-acetylcoumarin - MCF7	-0.447	3	-0.775	0.02342	0.0165	100
10	monastrol - MCF7	-0.442	7	-0.632	0.00297	0.0255	85
52	rottlerin - MCF7	-0.429	3	-0.764	0.02686	0.084	100
78	nitrendipine - MCF7	-0.341	3	-0.727	0.0418	0.0252	66
17	LY-294002 - HL60	-0.262	13	-0.441	0.00814	0.2738	53
1	trichostatin A - HL60	-0.255	34	-0.385	0	0.2953	50
76	thioridazine - HL60	-0.246	4	-0.638	0.04152	0.1947	50
6	tanespimycin - MCF7	0.268	36	0.328	0.00058	0.5158	52
59	sulfamerazine - MCF7	0.291	3	0.75	0.03081	0.042	66
63	monorden - MCF7	0.299	12	0.394	0.03283	0.3296	50
83	meclozine - MCF7	0.327	3	0.711	0.04729	0.1677	66
24	alvespimycin - MCF7	0.332	7	0.573	0.0104	0.2065	71
48	alprostadil - PC3	0.365	3	0.765	0.02594	0.0942	66
8	geldanamycin - MCF7	0.404	10	0.565	0.00148	0.2067	70
82	eucatropine - PC3	0.495	2	0.853	0.04374	0.0492	100
22	levonorgestrel - MCF7	0.5	3	0.829	0.0101	0.0319	100
68	naringin - MCF7	0.51	2	0.865	0.03694	0.0519	100
86	bacampicillin - MCF7	0.512	2	0.845	0.04815	0.0848	100
2	tanespimycin - PC3	0.514	12	0.664	2e-05	0.0455	83
75	tubocurarine chloride - MCF7	0.514	2	0.858	0.04094	0.0343	100
58	flumetasone - PC3	0.517	2	0.877	0.03026	0.0352	100
72	strophanthidin - MCF7	0.518	2	0.86	0.03956	0.0367	100
70	Prestwick-1080 - PC3	0.525	2	0.861	0.03901	0.0305	100
81	tetroquinone - MCF7	0.531	2	0.854	0.04326	0.0968	100
79	CP-863187 - MCF7	0.534	2	0.856	0.04219	0.0701	100
64	Prestwick-689 - MCF7	0.537	2	0.871	0.03368	0.0294	100
84	dicoumarol - PC3	0.538	2	0.847	0.04732	0.0144	100
69	salbutamol - PC3	0.541	2	0.862	0.03859	0.1754	100
42	sulfamonomethoxine - MCF7	0.542	2	0.894	0.02338	0.039	100
66	kawain - PC3	0.55	2	0.869	0.03515	0.028	100
51	solasodine - PC3	0.552	2	0.886	0.02686	0.0391	100
46	podophyllotoxin - MCF7	0.554	2	0.89	0.02525	0.0942	100
67	lomustine - MCF7	0.558	2	0.866	0.03678	0.1646	100
87	ofloxacin - MCF7	0.559	2	0.844	0.04871	0.0069	100
34	cyclizine - MCF7	0.562	2	0.909	0.01682	0.0513	100
21	tropicamide - MCF7	0.57	3	0.83	0.00981	0.0131	100
49	dyclonine - MCF7	0.58	2	0.887	0.02648	0.0296	100
26	norfloxacin - MCF7	0.582	2	0.925	0.01084	0.0078	100
47	napelline - MCF7	0.584	2	0.889	0.02549	0.0064	100
27	pyrantel - MCF7	0.585	2	0.921	0.01221	0	100
54	hexestrol - MCF7	0.588	2	0.883	0.02801	0.0562	100
30	doxorubicin - MCF7	0.592	2	0.913	0.01519	0.148	100
18	pinacidil - MCF7	0.608	2	0.934	0.00819	0	100
15	Gly-His-Lys - PC3	0.611	2	0.94	0.0068	0.0114	100
32	metolazone - MCF7	0.617	2	0.911	0.016	0.0058	100
16	chenodeoxycholic acid - MCF7	0.629	2	0.938	0.00734	0.0059	100
14	flunarizine - MCF7	0.635	2	0.944	0.00604	0.0121	100
19	aminoglutethimide - MCF7	0.637	2	0.932	0.00863	0.0136	100
11	phenindione - MCF7	0.641	2	0.958	0.00314	0	100
3	tacrolimus - MCF7	0.653	3	0.952	0.0001	0	100
20	alsterpaullone - PC3	0.655	2	0.929	0.00962	0.1149	100
9	minoxidil - PC3	0.693	2	0.966	0.00197	0.0146	100
41	clorsulon - MCF7	0.721	2	0.895	0.02302	0.0679	100
