# Supplementary material for: Cell Differentiation Trajectory-Associated Molecular Classification of Osteosarcoma
Source: Genes (Basel). 2021 Oct 23;12(11):1685. doi: 10.3390/genes12111685 (PMC8625454; doi:10.3390/genes12111685)
Supplement: Supplementary file 1 [file genes-12-01685-s001.zip › Supplement Table S5.xlsx]

## Sheet: Sheet1
Supplement Table S5. The top 10 outcome by random forest analysis
gene	raw.importance	rel.importance
CKLF	0.0287106	1
DKK1	0.0194822	0.678571
MYC	0.0169187	0.589286
PHB	0.00974109	0.339286
THBS1	0.0092284	0.321429
GADD45GIP1	0.00820302	0.285714
RPS14	0.00794668	0.276786
SERPINH1	0.00794668	0.276786
CREB3L1	0.00769034	0.267857
TUFM	0.00717765	0.25
