# Supplementary material for: Cell Differentiation Trajectory-Associated Molecular Classification of Osteosarcoma
Source: Genes (Basel). 2021 Oct 23;12(11):1685. doi: 10.3390/genes12111685 (PMC8625454; doi:10.3390/genes12111685)
Supplement: Supplementary file 1 [file genes-12-01685-s001.zip › Supplement Table S6.xlsx]

## Sheet: Sheet1
Supplement Table S6. To find independent predictors by univariate and multivariate cox regression analyses
In GEO cohort
univariate cox regression analysis
id	HR	HR.95L	HR.95H	pvalue
gender	1.14584	0.63316	2.07363	0.652839
age_mouths	1.00094	0.998923	1.00297	0.360203
tumor_site	0.620555	0.302167	1.27442	0.193765
Stage	3.45402	1.87494	6.36303	6.9961e-05
StromalScore	0.999854	0.999315	1.00039	0.595894
ImmuneScore	0.999763	0.999369	1.00016	0.239114
ESTIMATEScore	0.999876	0.99963	1.00012	0.325031
TumorPurity	3.46278	0.327371	36.6276	0.302032
riskScore	2.71828	1.72997	4.27119	1.44292e-05
multivariate cox regression analysis
id	HR	HR.95L	HR.95H	pvalue
gender	0.668376	0.32722	1.36522	0.268876
age_mouths	1.00161	0.999385	1.00384	0.156222
tumor_site	0.664927	0.305281	1.44827	0.304207
Stage	4.41263	2.18943	8.89333	3.30284e-05
StromalScore	1.00216	0.999458	1.00487	0.117247
ImmuneScore	1.00241	0.999542	1.00529	0.0996722
TumorPurity	2.75408e+09	0.0156149	4.85753e+20	0.09994
riskScore	3.14833	1.72215	5.75558	0.000194623
In TARGET cohort
univariate cox regression analysis
id	HR	HR.95L	HR.95H	pvalue
gender	0.971681	0.506002	1.86593	0.931234
age_mouths	0.998405	0.993149	1.00369	0.553392
stage_diagnosis	3.80585	1.98585	7.29383	5.64765e-05
tumor_site	1.08559	0.619992	1.90085	0.773845
StromalScore	0.999297	0.998699	0.999895	0.0213353
ImmuneScore	0.999589	0.999164	1.00001	0.0580709
ESTIMATEScore	0.999678	0.999405	0.999951	0.0209852
TumorPurity	44.829	1.69109	1188.37	0.0229575
riskScore	2.30755	1.49838	3.5537	0.000147366
multivariate cox regression analysis
id	HR	HR.95L	HR.95H	pvalue
gender	0.740356	0.360547	1.52027	0.41284
age_mouths	0.999884	0.993929	1.00588	0.969724
stage_diagnosis	4.86657	2.34461	10.1012	2.16695e-05
tumor_site	1.66446	0.964095	2.87361	0.0674411
StromalScore	0.999764	0.997523	1.00201	0.836594
ImmuneScore	0.999918	0.997675	1.00217	0.943216
TumorPurity	0.604851	1.17147e-11	3.12296e+10	0.968134
riskScore	2.34364	1.41915	3.8704	0.000875848
